# Supplementary material for: Expansions of chemosensory gene orthologs among selected tsetse fly species and their expressions in Glossina morsitans morsitans tsetse fly
Source: PLoS Negl Trop Dis. 2020 Jun 26;14(6):e0008341. doi: 10.1371/journal.pntd.0008341 (PMC7347240; doi:10.1371/journal.pntd.0008341)
Supplement: S1 Table — (XLSX) [file pntd.0008341.s002.xlsx]

## Sheet: Gene_Counts
			Morsitans			Palpalis		Fusca
Orthology Group	D. melanogaster Ortholog	D. melanogaster	G. m. morsitans	G. pallidipes	G. austeni	G. f. fuscipes	G. p. gambiensis	G. brevipalpis
VBGT00190000014282	Orco	1	1	1	1	1	1	1
VBGT00190000010214	Or30a	1	1	1	1	2	1	1
	Or49b	1	1	1	1	-	-	1
	Or43a	1	1	1	1	1	1	1
	-	-	1	1	1	1	1	-
VBGT00190000011071	Or10a	1	-	-	-	-	-	-
	Or45b	1	-	-	-	-	-	-
	Or24a	1	1	1	1	1	1	1
	Or22c	1	-	-	-	-	-	-
VBGT00190000010263	Or71a	1	1	-	1	1	1	1
	Or94a-b	2	-	-	-	-	-	-
	Or46a	1	2	1	1	2	2	1
VBGT00880000052277	Or67d,Or83c	2	5	5	4	6	4	5
VBGT00730000020153	Or45a	1	2	1	2	2	2	3
	Or1a	1	1	1	1	1	1	1
	Or82a	1	1	1	1	1	-	-
		2	-	-	-	-	-	-
VBGT00190000013239	Or83a	1	-	-	-	-	-	-
	-	-	1	1	1	1	1	1
VBGT00930000060528	Or67b	1	2	2	1	3	1	3
	Or63a	1	-	-	-	-	-	-
VBGT00840000047907	Or67a	1	-	-	-	-	-	-
	Or49a,Or85f	2	-	2	-	-	-	-
	Or69a	1	-	-	-	-	-	-
	Or92a, Or67c	2	2	2	1	1	2	3
	Or85b-c	2	1	1	1	1	1	1
	Or85d	1	-	-	-	-	-	-
	-	-	1	1	1	1	-	1
	-	-	1	1	1	-	1	1
VBGT00190000014847	Or65a-c, Or47b	4	1	1	1	1	1	1
VBGT00830000047116	Or88a	1	1	-	1	1	1	1
VBGT00900000058268	Or56a	1	1	1	1	1	1	2
VBGT00190000010232	Or7a	1	3	2	3	2	3	2
	Or42a-b, Or43b, Or22a-b,Or59b-c, Or85a,Or98a	9	1	1	1	1	1	1
	Or19a-b	2	1	1	1	1	1	1
	Or2a	1	1	1	1	1	1	1
	Or23a,Or59a	2	1	1	1	1	1	1
	Or33a-c,	3	1	1	1	2	2	2
VBGT00900000058074	Or13a	1	1	1	1	1	1	2
	Or35a, Or74a	2	1	-	1	1	1	1
Total		58	39	35	35	39	35	41
VBGT00190000009824	Ir41a	1	1	1	1	1	1	2
	Ir76a	1	-	-	-	-	-	-
	Ir92a	1	1	1	1	1	1	2
VBGT00190000009736	Ir75c-b	1	-	-	-	-	-	-
	Ir75a	1	1	1	1	3	1	1
	Ir31a	1	1	1	1	2	1	1
	Ir84a	1	3	1	1	1	1	1
	Ir64a	1	1	1	1	1	1	1
	Ir75d	1	1	1	1	-	1	1
VBGT00730000019979	Ir100a	1	1	1	1	1	1	1
VBGT00190000012412	Ir21a	1	1	1	1	2	1	1
VBGT00190000011427	Ir60a	1	1	1	1	1	1	1
	Ir87a	1	-	-	-	-	-	-
VBGT00740000024548	Ir40a	1	1	1	1	1	1	1
VBGT00190000009872	Ir7g	1	-	-	-	-	-	-
	Ir7f	1	-	-	-	-	-	-
	Ir7e	1	-	-	-	-	-	-
	Ir7d	1	-	-	1	1	1	1
	Ir7b	1	-	-	-	-	-	-
	Ir7a, Ir11a	2	-	-	-	-	-	-
	Ir7c	1	-	-	-	-	-	-
VBGT00190000013104	Ir68a	1	1	1	1	1	1	2
	-		-	1	1	1	1	1
VBGT00810000045104	Ir51b,Ir56b	2	-	1	1	1	1	1
	Ir56b	1	-	1	-	1	1	1
	Ir56d	1	-	1	1	1	1	1
	Ir56c	1	-	-	-	-	-	-
	Ir62a	1	-	-	-	-	-	-
VBGT00820000046003	clumsy	1	1	1	1	1	1	1
	Ir25a	1	1	1	1	1	1	1
	Ir8a	1	1	1	1	1	1	1
	Ir76b	1	-	-	1	1	-	-
	Ir93a	1	-	1	1	1	-	1
Total		34	17	20	21	25	20	24
VBGT00730000020416	Gr28a	1	-	-	-	-	-	-
	Gr28b	1	1	2	2	1	1	3
	-	-	1	1	1	1	1	1
VBGT00930000060595	Gr2a	1	1	1	1	1	1	1
	Gr23a	1
VBGT00730000020463	Gr66a	1	1	1	-	1	1	-
VBGT00730000020933	Gr33a	1	1	1	1	1	1	-
VBGT00190000010879	Gr21a	1	1	1	1	1	1	1
	Gr63a	1	1	1	1	1	1	1
	-	-	1	1	1	3	1	1
	-	-	1	1	1	1	1	1
VBGT00770000031805	Gr59f	1	-	2	2	2	2	2
VBGT00790000039930	Gr32a, Gr68a	2	-	1	1	1	1	-
	Gr39a	1
VBGT00770000031960	Gr59e	1	-	1	-	1	1	-
Total		13	9	14	12	15	13	11
VBGT00190000013782	Obp59a	1	1	1	1	1	1	1
VBGT00190000009994	Obp83a	1	3	2	2	2	2	2
	Obp83b	1	1	1	-	1	-	1
	-	-	1	1	1	1	1	1
VBGT00190000013627	Obp73a	1	1	2	1	1	1	1
VBGT00190000011082	Obp44a	1	1	1	1	1	2	1
	Obp83g	1	1	1	1	1	1	1
	Obp99b	1	1	1	1	1	1	1
	Obp99a	1	-	-	-	-	-	-
VBGT00190000010198	Obp19a	1	1	1	1	1	1	1
	Lush	1	1	1	-	1	1	1
VBGT00190000014284	Obp84a	1	1	1	1	1	-	1
VBGT00730000020681	Obp69a	1	1	1	1	1	1	1
VBGT00190000015427	Obp19d	1	1	1	1	-	1	1
	Obp28a	1	1	1	1	1	1	1
VBGT00190000019826	Obp19c	1	1	1	1	1	1	1
VBGT00190000019863	Obp19b	1	1	1	1	1	1	1
VBGT00730000021566	Obp99c	1	1	1	1	1	1	1
VBGT00190000018124	Obp8a	1	1	1	1	1	1	1
VBGT00190000018120	Obp56h	1	1	1	1	1	1	1
VBGT00190000016502	Obp83e-f	1	1	1	1	1	1	1
	Obp83c-d	1	1	1	1	2	1	1
VBGT00190000018815	Obp99d	1	1	1	1	1	1	-
Total		22	24	24	21	23	22	22
VBGT00190000009656	ebpIII	1	1	1	1	1	1	1
	-	-	1	1	1	1	1	-
	a10	1	1	1	1	1	1	1
	Phk-3	1	1	1	1	1	1	1
Total		3	4	4	4	4	4	3
VBGT00820000046016	Snmp1	1	1	1	1	1	1	1
	Snmp2	1	1	1	1	1	1	1
Total		2	2	2	2	2	2	2
	Expanded orthologs
