# Supplementary material for: Expansions of chemosensory gene orthologs among selected tsetse fly species and their expressions in Glossina morsitans morsitans tsetse fly
Source: PLoS Negl Trop Dis. 2020 Jun 26;14(6):e0008341. doi: 10.1371/journal.pntd.0008341 (PMC7347240; doi:10.1371/journal.pntd.0008341)
Supplement: S3 Table — (XLSX) [file pntd.0008341.s004.xlsx]

## Sheet: MA Plot - Abundant
Table S3 - MA-plot data for most abudantly expressed transcripts
	EdgeR Analysis				Vectorbase Annotation			Best Hit Flybase Database Blastx
Gene ID	Log2 Fold Change	Log2 Count per Million	FDR p-value		Description		Protein ID	Lowest E-value	Description
GMOY012059-RA	18.8836	10.5762	2.75737e-155		neither inactivation nor afterpotential C		FBpp0306863	0	neither inactivation nor afterpotential C
GMOY002601-RA	14.7804	15.0804	2.81264e-119		G protein-coupled receptor		FBpp0083266	0	neither inactivation nor afterpotential E
GMOY006979-RA	14.1958	14.0768	1.17783e-93		Arrestin		FBpp0080583	0	Arrestin 1
GMOY012064-RA	12.7392	12.6326	3.21381e-56		trpl: calmodulin binding trp-like protein		FBpp0290876	0	transient receptor potential-like
GMOY011996-RA	12.4938	10.7931	5.99197e-142		trp: transient receptor potential		FBpp0084879	0	transient receptor potential
GMOY004136-RA	11.48	10.8564	1.43722e-131		Protein kinase C		FBpp0086196	0	inactivation no afterpotential C
GMOY005668-RA	9.5451	12.4803	3.38366e-91		arrestin		FBpp0076326	0	Arrestin 2
GMOY012092-RA	8.57686	10.2816	3.04322e-58		G protein beta-subunit 76C		FBpp0074717	0	G protein beta-subunit 76C
GMOY008178-RA	7.23526	10.5911	8.74655e-69		-		-	-	-
GMOY007256-RA	6.88526	10.0411	3.03653e-39		Phosphoribosylamidoimidazole-succinocarboxamide synthase		FBpp0073538	0	ade5
GMOY006073-RA	6.79058	10.4496	2.09636e-79		HGD: Homogentisate 1,2-dioxygenase		FBpp0079790	0	homogentisate 1,2-dioxygenase
GMOY012089-RA	6.40096	10.6777	2.9255e-67		PLC: phospholipase C		FBpp0290690	0	no receptor potential A
GMOY009244-RA	5.2106	10.2787	9.0454e-32		Calcium-transporting ATPase		FBpp0072124	0	Calcium ATPase at 60A
GMOY004228-RA	4.54025	10.8613	4.49348e-25		Tsf1: Transferrin		FBpp0074331	0	Transferrin 1
GMOY004931-RA	3.46541	10.3189	7.64287e-30		NADP-dependent isocitrate dehydrogenase		FBpp0076397	0	-
GMOY004850-RA	3.22695	10.6338	4.64687e-09		Phosphoenolpyruvate carboxykinase		FBpp0085880	0	Phosphoenolpyruvate carboxykinase
GMOY011747-RA	3.00131	13.8588	9.43828e-05		-		FBpp0100187	9.08066e-25	ND1 description
GMOY005234-RA	2.81328	10.1217	2.4846e-12		-		FBpp0291090	1.11737e-110	PFTAIRE-interacting factor 1A
GMOY004926-RA	2.73762	12.1482	8.0505e-11		fas-1: fatty acid synthase 1		FBpp0077343	0	-
GMOY005519-RA	2.6974	10.0478	1.4161e-16		chitinase		FBpp0309782	0	Imaginal disc growth factor 4
GMOY011717-RA	2.65652	10.0463	1.29016e-16		Amino acid transporter		FBpp0290532	0	Excitatory amino acid transporter 2
GMOY007294-RA	2.40488	10.2413	2.30873e-07		OGDH: 2-oxoglutarate		FBpp0111773	0	Neural conserved at 73EF
GMOY000067-RA	2.34277	11.518	2.9769e-14		Alkaline phosphatase		FBpp0081538	0	-
GMOY001043-RA	2.28533	10.4756	9.55747e-11		-		FBpp0086257	0	-
GMOY001238-RA	2.28098	10.277	4.04982e-13		Gelsolin		FBpp0078607	0	Gelsolin
GMOY011578-RA	2.09551	13.5835	1.17661e-12		Fatty acyl-CoA desaturase		FBpp0082095	0	Desaturase 1
GMOY005692-RA	-2.02983	11.1283	0.00157129		-		FBpp0306645	0	Cyclin B3
GMOY000890-RA	-2.03858	11.9717	1.59807e-09		OBP1: Odorant binding protein 1		FBpp0308406	2.47607e-57	Odorant-binding protein 44a
GMOY002158-RA	-2.39113	11.6505	5.69372e-10		E3: Ubiquitin Ligase		FBpp0082159	0	Cyp304a1
GMOY008073-RA	-2.41369	11.0944	2.454e-15		cyp28d1: cyp28d1		FBpp0078698	3.92186e-162	Cyp28d1
GMOY012164-RA	-2.6109	10.184	6.36472e-13		CSP1: Chemosensory protein 1		FBpp0309999	6.87632e-50	Ejaculatory bulb protein III
GMOY002492-RA	-2.66247	11.5034	2.84182e-16		-		FBpp0084185	1.27615e-62	takeout
GMOY009116-RA	-2.71287	11.2801	3.24245e-08		fmo-2: flavin-containing monooxygenase 2		FBpp0085481	1.00403e-137	Flavin-containing monooxygenase 2
GMOY004361-RA	-2.88432	10.9963	7.68825e-22		Tetraspanin		FBpp0085856	1.14735e-92	Glutathione S transferase E7
GMOY003933-RA	-3.1573	10.482	4.6721e-11		scyl: scylla		FBpp0075899	1.23606e-43	scylla
GMOY004423-RA	-3.34789	11.5469	1.50659e-13		Msr-110		FBpp0311254	2.72102e-52	Msr-110
GMOY003148-RA	-3.60898	10.6103	8.82959e-21		-		FBpp0288866	0	-
GMOY010132-RA	-4.03426	12.0509	1.11549e-32		Cyp6g1		FBpp0308668	0	Cyp6g1
GMOY003117-RA	-4.158	10.4827	2.26171e-32		-		FBpp0306278	0	-
GMOY007468-RA	-4.36304	10.2026	1.00408e-41		-		-	-	-
GMOY007415-RA	-4.62265	11.3571	2.24796e-20		putative glycin-rich protein		FBpp0089363	8.3802e-32	bancal
GMOY005610-RA	-4.83948	10.2313	2.49919e-37		Orco: odorant receptor obligate co-receptor Orco		FBpp0112105	0	Odorant receptor co-receptor
GMOY010026-RA	-4.89858	11.3555	3.69425e-39		CSP2: chemosensory protein 2		FBpp0075050	4.08561e-59	antennal protein 10
GMOY005184-RA	-4.90565	12.2347	1.39637e-44		Os-E: Olfactory specific gene E		FBpp0078304	1.28972e-76	Odorant-binding protein 83b
GMOY004356-RA	-4.94258	10.0681	1.97391e-40		-		FBpp0078913	3.37174e-124	-
GMOY009021-RA	-4.95909	10.7282	2.07088e-41		-		FBpp0079979	1.23159e-72	-
GMOY010133-RA	-5.01921	12.0712	3.82695e-38		-		FBpp0087117	0	Cyp6g2
GMOY002994-RA	-5.07083	10.2666	3.56761e-31		SNMP1: sensory neuron membrane protein 1		FBpp0306056	0	Sensory neuron membrane protein 1
GMOY013254-RA	-5.1512	10.7178	1.89077e-54		OBP8: odorant binding protein 8		FBpp0078305	3.3351e-57	Odorant-binding protein 83a
GMOY004317-RA	-5.17911	14.4487	7.83432e-44		Odorant binding protein 8		FBpp0078305	1.07265e-45	Odorant-binding protein 83a
GMOY006523-RA	-5.18967	11.2421	3.63235e-55		OBP14: odorant binding protein 14		FBpp0297995	2.89706e-55	Odorant-binding protein 19a
GMOY005343-RA	-5.42608	10.1423	1.40058e-47		antennal protein		FBpp0077588	9.85871e-61	antennal protein 5

## Sheet: Volcano Plot - Significant
Table S3 - Volcano-plot data for most significantly expressed transcripts
	EdgeR Analysis				Vectorbase Annotation			Best Hit Flybase Database Blastx
Gene ID	Log2 Fold Change	Log2 Count per Million	FDR p-value		Description		Protein ID	Lowest E-value	Description
GMOY012059-RA	18.8836	10.5762	2.75737e-155		neither inactivation nor afterpotential C		FBpp0306863	0	neither inactivation nor afterpotential C
GMOY006736-RA	15.9313	7.62296	8.58626e-109		Rhodopsin		FBpp0309539	4.40975e-179	Rhodopsin 5
GMOY010415-RA	15.755	7.44647	1.38465e-124		-		FBpp0075190	3.22344e-05	-
GMOY012367-RA	15.1484	6.8392	6.09132e-115		Nmda1: N-methyl-D-aspartate receptor-associated protein		FBpp0086928	0	-
GMOY004791-RA	15.0054	6.6961	8.52232e-114		Chd64: Chd64		FBpp0083275	8.61614e-110	-
GMOY012085-RA	14.9499	6.64048	2.99296e-114		lazaro		FBpp0078160	1.85017e-98	lazaro
GMOY000918-RA	14.9321	6.6226	1.37824e-116		-		FBpp0291423	7.68267e-101	-
GMOY002601-RA	14.7804	15.0804	2.81264e-119		G protein-coupled receptor		FBpp0083266	0	neither inactivation nor afterpotential E
GMOY004726-RA	14.6318	6.32183	8.34822e-111		-		FBpp0077236	2.00389e-23	-
GMOY008289-RA	14.5631	6.25297	2.33496e-110		-		FBpp0085623	0	-
GMOY012134-RA	14.507	8.95816	6.91226e-130		inactivation no afterpotential D		FBpp0071820	0	inactivation no afterpotential D
GMOY001239-RA	14.4433	6.13292	7.77748e-102		-		-	-	-
GMOY006979-RA	14.1958	14.0768	1.17783e-93		Arrestin		FBpp0080583	0	Arrestin 1
GMOY005527-RA	14.0391	8.99717	6.98472e-131		pugilist		FBpp0296942	0	pugilist
GMOY010949-RA	13.9053	5.59354	3.09233e-89		Kynurenine 3-monooxygenase		FBpp0311059	0	cinnabar
GMOY007111-RA	13.8883	5.57648	4.39185e-84		-		FBpp0111998	2.00487e-35	-
GMOY006391-RA	13.6606	7.33377	2.92209e-121		-		FBpp0303774	2.59635e-89	transient receptor potential
GMOY001602-RA	13.4759	5.16274	7.965e-73		-		FBpp0303662	0	-
GMOY009915-RA	13.4175	5.10404	1.19635e-77		-		FBpp0083733	1.84684e-29	-
GMOY010411-RA	12.7471	8.40845	4.14394e-114		-		FBpp0075134	2.31297e-20	retinin
GMOY012064-RA	12.7392	12.6326	3.21381e-56		trpl: calmodulin binding trp-like protein		FBpp0290876	0	transient receptor potential-like
GMOY002805-RA	12.6726	4.35563	4.80793e-49		-		-	-	-
GMOY002473-RA	12.5035	4.18506	9.32765e-50		vglut: Vesicular glutamate transporter		FBpp0297921	0	Vesicular glutamate transporter
GMOY011996-RA	12.4938	10.7931	5.99197e-142		trp: transient receptor potential		FBpp0084879	0	transient receptor potential
GMOY012204-RA	12.4748	6.92634	2.56374e-113		Peptidyl-prolyl cis-trans isomerase		FBpp0077688	9.50478e-121	neither inactivation nor afterpotential A
GMOY003425-RA	12.427	8.67002	9.54603e-107		-		FBpp0289868	5.20928e-18	-
GMOY007126-RA	12.1367	3.81505	1.33481e-44		so: sine oculis		FBpp0089177	3.75958e-144	sine oculis
GMOY012146-RA	12.0937	3.7713	6.05929e-44		DDO: D-aspartate oxidase		FBpp0078967	4.59549e-152	-
GMOY011141-RB	11.9816	9.08348	3.07086e-102		astrocytic leucine-rich repeat molecule		FBpp0084220	0	astrocytic leucine-rich repeat molecule
GMOY004957-RA	11.9503	5.62124	1.69927e-91		-		FBpp0296935	1.63644e-44	Tropomyosin 1
GMOY002474-RA	11.7979	3.47343	1.24062e-36		-		FBpp0085494	1.61105e-28	-
GMOY000603-RA	11.7975	3.47366	8.04724e-34		PDF: pigment dispersing factor		FBpp0084396	9.90974e-19	Pigment-dispersing factor
GMOY010039-RA	11.7277	3.40247	9.58322e-36		optix: optix		FBpp0302920	0	Optix
GMOY012104-RA	11.7065	3.37965	1.54499e-37		Proct: proctolin		FBpp0310066	2.46651e-11	Proctolin
GMOY003945-RA	11.677	3.35021	2.22637e-37		-		FBpp0076057	6.7189e-15	Insulin-like peptide 1
GMOY011859-RA	11.6614	3.33508	8.4009e-36		-		FBpp0296948	1.20453e-90	tenectin
GMOY010768-RA	11.6278	3.30019	1.06956e-36		-		FBpp0289955	3.52841e-32	Serine Protease Immune Response Integrator
GMOY003037-RA	11.503	9.17201	2.73434e-113		PPAT: Amidophosphoribosyltransferase		FBpp0076655	0	Phosphoribosylamidotransferase 2
GMOY004136-RA	11.48	10.8564	1.43722e-131		Protein kinase C		FBpp0086196	0	inactivation no afterpotential C
GMOY012106-RA	11.468	3.14146	3.6863e-27		AstC: allatostatin C		FBpp0079821	2.57883e-24	Allatostatin C
GMOY007597-RA	11.4027	5.05137	9.83223e-74		Serine/threonine-protein phosphatase		FBpp0306613	0	Calcineurin A1
GMOY009230-RA	11.2143	2.87917	3.28915e-29		ORCK: orcokinin		FBpp0072118	3.71106e-06	-
GMOY008960-RA	11.1442	2.81155	2.01521e-28		-		FBpp0297921	1.51984e-45	Vesicular glutamate transporter
GMOY005323-RA	11.0425	2.70248	2.27547e-24		-		FBpp0087067	1.03013e-40	-
GMOY008807-RA	11.0176	2.68262	1.35339e-27		-		FBpp0293128	0	-
GMOY011334-RA	10.9911	9.05127	2.81264e-119		-		FBpp0110455	0	-
GMOY002341-RA	10.963	2.62516	1.21138e-28		-		FBpp0080482	3.72195e-159	-
GMOY005900-RA	10.8764	2.53519	2.55836e-26		-		FBpp0099998	1.47777e-06	-
GMOY008051-RA	10.8658	2.5273	3.47847e-27		ey: eyeless		FBpp0099810	6.10308e-109	eyeless
GMOY001389-RA	10.8266	6.15722	2.66608e-101		Putative uncharacterized protein		FBpp0076257	1.54257e-21	-
GMOY002314-RA	10.7925	8.34385	5.30159e-19		-		-	-	-
GMOY003470-RA	10.7738	4.41042	9.48512e-38		Akh2: adipokinetic hormone 2		FBpp0073069	3.97807e-27	Adipokinetic hormone
GMOY002046-RA	10.7338	2.39222	3.44532e-26		-		FBpp0112341	5.46494e-102	-
GMOY001415-RA	10.6325	2.29032	2.49424e-24		-		FBpp0306510	1.42973e-120	Rho GTPase activating protein at 102A
GMOY009416-RA	10.5526	9.40491	3.4349e-57		Rhodopsin		FBpp0082600	0	Rhodopsin 6
GMOY013293-RA	10.5134	5.46589	7.37742e-76		Ance-4		FBpp0087745	0	Ance-4
GMOY008458-RA	10.4676	6.42502	3.82345e-93		Actin 88F		FBpp0082597	0	Actin 88F
GMOY009868-RA	10.4298	4.89652	6.17888e-68		-		FBpp0085470	0	lethal (2) 01289
GMOY009381-RA	10.3917	2.06949	2.5461e-07		Purple acid phosphatase		FBpp0312076	3.225e-136	-
GMOY002877-RA	10.385	2.03569	4.64479e-23		-		FBpp0288822	8.93153e-169	Down syndrome cell adhesion molecule 4
GMOY011606-RA	10.3847	6.28571	3.56651e-66		-		FBpp0303053	5.81792e-21	-
GMOY005242-RA	10.3372	8.97426	3.67317e-67		-		FBpp0292441	7.15583e-06	-
GMOY003176-RA	10.2806	7.47076	2.91106e-86		-		FBpp0297599	2.27487e-83	Myofilin
GMOY003618-RA	10.2531	1.90343	3.67091e-21		inaF-C		FBpp0111435	1.52706e-11	inaF-C
GMOY006380-RA	10.2193	4.68573	1.41039e-61		-		FBpp0297622	2.34301e-111	-
GMOY008189-RA	10.2172	1.85925	7.48471e-20		juvenile hormone acid methyltransferase		FBpp0309208	1.13637e-98	juvenile hormone acid methyltransferase
GMOY009606-RA	10.1367	5.75849	5.94787e-88		-		FBpp0073218	0	-
GMOY004045-RA	10.1341	4.5729	8.09079e-54		erm: earmuff		FBpp0077539	0	earmuff
GMOY011071-RA	10.1054	1.75097	7.85572e-21		-		FBpp0303149	8.91805e-50	Sox21b
GMOY011892-RA	10.0747	4.56966	1.37975e-54		myosuppressin		FBpp0306667	1.39986e-11	Myosuppressin
GMOY011277-RA	10.0643	5.01474	1.6839e-68		Neuroligin		FBpp0078972	0	Neuroligin 2
GMOY004859-RA	-5.40386	0.273938	5.82372e-07		-		FBpp0303114	8.292e-06	-
GMOY005343-RA	-5.42608	10.1423	1.40058e-47		antennal protein		FBpp0077588	9.85871e-61	antennal protein 5
GMOY010267-RA	-5.44041	5.78729	1.27448e-53		-		FBpp0080740	2.30761e-69	-
GMOY004663-RA	-5.45087	4.95719	1.43901e-40		Ionotropic receptor 40a		FBpp0307914	0	Ionotropic receptor 40a
GMOY003061-RA	-5.4553	4.38735	1.01662e-07		Cuticular protein 64Ac		FBpp0073108	1.30228e-36	Cuticular protein 64Ac
GMOY012275-RA	-5.46356	7.20263	1.66769e-50		-		FBpp0078305	1.77961e-28	Odorant-binding protein 83a
GMOY003527-RA	-5.46518	6.41142	2.12591e-39		-		FBpp0077901	2.28179e-160	-
GMOY011529-RA	-5.4738	7.73339	8.24167e-26		-		FBpp0290120	0	-
GMOY008626-RA	-5.49203	4.82324	2.3362e-20		-		FBpp0290410	0	-
GMOY009804-RA	-5.49754	8.25579	2.93407e-54		Anoctamin		FBpp0288570	0	-
GMOY006081-RA	-5.49916	7.09749	1.70761e-41		Odorant-binding protein 59a		FBpp0071781	5.86388e-36	Odorant-binding protein 59a
GMOY010134-RA	-5.51809	8.63841	3.80725e-26		Cyp6t3		FBpp0087101	7.46522e-132	Cyp6t3
GMOY006265-RA	-5.53888	5.78638	2.47459e-32		Or44: odorant receptor		FBpp0076026	2.01255e-88	Odorant receptor 67d
GMOY001211-RA	-5.58825	3.60774	4.01854e-08		-		FBpp0080134	1.10677e-12	-
GMOY001309-RA	-5.61614	7.09095	6.23568e-55		-		FBpp0301973	4.32998e-160	Sp1
GMOY011876-RA	-5.61965	6.63388	1.07128e-13		ATP-binding Cassette (ABC) Superfamily transporter		FBpp0099384	0	-
GMOY007283-RA	-5.61991	6.23187	1.87957e-39		-		FBpp0072967	2.32281e-80	-
GMOY007198-RA	-5.62099	9.33183	2.08946e-44		-		-	-	-
GMOY013027-RA	-5.63971	0.472352	2.08128e-07		-		-	-	-
GMOY005530-RA	-5.6542	4.16473	4.54587e-16		-		FBpp0271862	1.9857e-17	Sp1
GMOY008466-RA	-5.70611	6.27709	3.40266e-10		-		-	-	-
GMOY008039-RA	-5.75428	6.66994	1.75575e-06		-		-	-	-
GMOY010418-RA	-5.76109	4.30799	9.81817e-08		-		FBpp0075191	1.65258e-16	-
GMOY008540-RA	-5.76996	5.52562	1.19001e-49		-		FBpp0271900	8.28307e-161	Ionotropic receptor 75a
GMOY012048-RA	-5.77767	5.54185	1.74941e-30		Ir31a: Ionotropic receptor 31a		FBpp0307911	0	Ionotropic receptor 31a
GMOY007105-RA	-5.80672	9.20773	2.76148e-37		-		FBpp0071799	0	-
GMOY004392-RA	-5.81371	2.67024	1.51336e-10		Or39: odorant receptor		FBpp0082351	6.92929e-50	Odorant receptor 88a
GMOY006751-RA	-5.84256	2.66533	5.56393e-18		Ir21a: Ionotropic receptor (Ir21a)		FBpp0111921	0	Ionotropic receptor 21a
GMOY001634-RA	-5.86814	7.02143	9.48758e-16		-		FBpp0305211	3.78538e-42	-
GMOY000184-RA	-5.87426	4.47392	9.58798e-32		-		FBpp0304266	0	Argonaute 2
GMOY013237-RA	-5.88501	2.07521	2.14998e-08		Or33: odorant receptor		FBpp0086894	7.86897e-153	Odorant receptor 49b
GMOY005216-RA	-5.88506	0.739687	5.9549e-08		Chemosensory protein A 75a		FBpp0074895	4.05588e-48	Chemosensory protein A 75a
GMOY002964-RA	-5.93464	0.714864	3.61353e-07		-		FBpp0302591	1.06311e-14	-
GMOY004068-RA	-5.94452	3.52518	4.53017e-18		lbl: ladybird late		FBpp0083491	1.11975e-108	ladybird late
GMOY005262-RA	-5.9914	5.75506	3.97696e-21		-		-	-	-
GMOY008170-RA	-6.0246	9.08945	3.57816e-07		-		-	-	-
GMOY013279-RA	-6.19251	2.3538	3.50339e-11		-		FBpp0079632	0	-
GMOY012318-RA	-6.31335	6.65533	1.75267e-38		-		FBpp0077268	1.78182e-133	-
GMOY004518-RA	-6.37777	3.80196	1.31875e-24		-		FBpp0307898	9.24788e-97	Ionotropic receptor 84a
GMOY008437-RA	-6.4201	5.60604	3.51385e-21		-		FBpp0302039	1.02932e-114	midline
GMOY011615-RA	-6.77435	3.82526	7.19863e-20		Gustatory receptor		FBpp0089142	1.99516e-171	Gustatory receptor 28b
GMOY006760-RA	-7.05008	1.77593	1.55914e-13		-		FBpp0070074	4.59705e-63	asense
GMOY009315-RA	-7.06088	1.72419	5.28984e-08		-		-	-	-
GMOY000536-RA	-7.07226	7.41449	2.96432e-55		spineless		FBpp0297169	0	spineless
GMOY002893-RA	-7.21518	3.90557	5.19107e-09		Cuticular protein 62Bc		FBpp0304919	2.60532e-36	Cuticular protein 62Bc
GMOY012018-RB	-7.38745	-0.481982	4.51464e-06		Or5: odorant receptor		FBpp0079863	7.3456e-54	Odorant receptor 33b
GMOY010563-RA	-7.40317	-0.472618	4.62828e-06		-		-	-	-
GMOY004100-RB	-7.58123	2.25817	2.27746e-09		Polymerase delta-interacting protein PDIP1		FBpp0289150	1.05999e-37	-
GMOY009313-RA	-8.22423	5.77219	1.93778e-12		-		-	-	-
GMOY003118-RA	-8.88452	0.784923	1.19286e-09		-		FBpp0089088	6.52321e-58	Eb1
GMOY003934-RA	-9.81726	4.38661	7.50446e-12		Aconitate hydratase, mitochondrial		FBpp0312178	0	Aconitase
